# Supplementary material for: Synthesis and structural characterization of Be(η5-C5Me5)(η1-C5Me4H). Evidence for ring-inversion leading to Be(η5-C5Me4H)(η1-C5Me5)
Source: Royal Society of Chemistry journal article supplement (doi:10.1039/b208972f), 2002-01-01
Supplement: b208972f.doc [file b208972f.doc]

**Title:** Synthesis and structural characterization of Be(5-C5Me5)(1-C5Me4H). Evidence for ring-inversion leading to Be(5-C5Me4H)(1-C5Me5).

**Authors:** M. M. Conejo, R. Fernández, D. del Río, E. Carmona*, A. Monge and C. Ruiz.

**Supplementary Material (ESI) for Chemical Communications**

**This journal is © The Royal Society of Chemistry 2002-09-05**

**Synthesis and characterization**

**Caution!** Beryllium compounds are very toxic by inhalation and in contact with the skin are irritating to the respiratory system, and present the danger of very serious irreversible effects.

*Compound* ***1***

Be(C5Me5)Cl (0.21g, 1.17 mmol) and KC5Me4H (0.19 g, 1.17 mmol) were suspended in 60 mL of a 1:1 mixture of toluene:diethylether and heated, with stirring, at 115 oC for 36 h. Removal of the solvent under reduced pressure and extraction with petroleum ether, followed by filtration, afforded a clear solution from which colourless crystals of the title compound were collected after concentration and cooling at -30 oC. Yield 26%; m.p. 96-99 oC. 1H NMR (400 MHz, [D6]benzene, 25 oC,  ppm): 1.67 (15H, C5*Me5*), 1.95 and 2.02 (6H, 6H, C5*Me4*H), 3.5 (1H, C5Me4*H*). 13C{1H} NMR (100 MHz, [D6]benzene, 25 oC,  ppm) : 8.8 (C5*Me5*); 11.0 and 13.6 (2Me, 2Me, C5*Me4*H), 67.0 (*C*H), 108.6 (*C5*Me5) 122.5 and 124.2 (2C, 2C, *C5*Me4H). Elemental analysis (%) for C19H28Be calcd.: C: 86.0, H: 10.5, found: C: 84.8, H: 10.8.

*Compound* ***2***

**1** (0.265 g, 1 mmol) and CNXyl (Xyl = C6H3-2,6-Me2; 0.131 g, 1 mmol) were dissolved in petroleum ether (20 mL) and the mixture was stirred at room temperature for 16 h. Removal of the solvent in vacuo and extraction with petroleum ether afforded crystals of **2** after cooling at -30 oC. Yield 48%; m.p. 146-148 oC. 1H NMR (500 MHz, [D6]benzene, 25 oC,  ppm): 1.59, 1.33 and 4.70 (2Me, 2Me and CH of 5-C5*Me4H*, respectively); 1.81, 1.74 and 1.45 (2Me, 2Me and 1Me from C5*Me5*); 2.05, 7.04 and 6.89 (CNXyl). 13C{1H} NMR (100 MHz, [D6]benzene, 25 oC,  ppm) : 8.5 and 10.7 (2Me, 2Me, 5-C5*Me*4H), 100.6, 109.6 and 111.2 (CH, 2C and 2C, 5-*C*5Me4H), 11.0, 11.5 and 16.6 (1Me, 2Me, 2Me, C5*Me5*), 71.2 (Cq, *C*5Me5), 135.6 and 140.5 (2C, 2C, *C*5Me5), 19.5 (2Me, CNXyl), 120.9, 125.2 128.0 (Car, CNXyl), 156.4 (*C*=N). IR (Nujol)  1570 cm-1 (C=N). Elemental analysis (%) for C29H39NBe calcd.: C: 84.9, H: 9.3, N: 3.5, found C: 84.5, H: 9.4, N: 3.5.

**Computational details**

The electronic structure and geometries of the model complexes Be(5-C5Me5)(1-CpMe4H) (cases **A**, **B** and **C**) and Be(5-C5HMe4)(1-CpMe5) (case **D**) were computed within the density functional theory at the B3LYP[1, 2] level. We used the 6-31G(d) basis set for all the C and H atoms, while Be was described with the 6-311G(d) basis set. Geometries were optimized under no symmetry constraint. The optimized geometries were characterized as energy minima (NImag = 0) by diagonalization of the analytically computed Hessian (vibrational frecuency calculations). The energy difference reported include the zero point energy corrections. All the calculations were performed using the Gaussian-98 package.[3]

[1] A. D. Becke, *J. Chem. Phys.* 1993, **98**, 5648.

[2] C. Lee, Y. Wang, R. G. Parr, *Phys. Rev. B* 1988, ***37***, 785.

[3] M. J. Frisch, G. W. Trucks, H. B. Schlegel, G. E. Scuseria, M. A. Robb, J. R. Cheeseman, V. G. Zakrzewski, J. A. Montgomery, J. R. E. Stratmann, J. C. Burant, S. Dapprich, J. M. Millam, A. D. Daniels, K. N. Kudin, M. C. Strain, O. Farkas, J. Tomasi, V. Barone, M. Cossi, R. Cammi, B. Mennucci, C. Pomelli, C. Adamo, S. Clifford, J. Ochterski, G. A. Petersson, P. Y. Ayala, Q. C. K. Morokuma, D. K. Malick, A. D. Rabuck, K. Raghavachari, J. B. Foresman, J. Cioslowski, J. V. Ortiz, A. G. Baboul, B. B. Stefanov, G. Liu, A. Liashenko, P. Piskorz, I. Komaromi, R. Gomperts, R. L. Martin, D. J. Fox, T. Keith, M. A. Al-Laham, C. Y. Peng, A. Nanayakkara, C. Gonzalez, M. Challacombe, P. M. W. Gill, B. Johnson, W. Chen, M. W. Wong, J. L. Andres, M. Head-Gordon, E. S. Replogle, J. A. Pople, *Revision A*.7 ed., Gaussian Inc., Pittsburgh PA, 1998.

**Table S1.** Bond distances (Å), angles (º), dihedral angles (º) and relative energies (kcal·mol-1) for calculated Be(5-C5Me5)(1-C5Me4H) model complexes (cases **A**, **B** and **C**) and for calculated Be(5-C5Me4H)(1-C5Me5) model complex (case **D**).

| **Structural data** | **Case A** | **Case B** | **Case C** | **Case D** |
| --- | --- | --- | --- | --- |
|  | Ra=H  Rb=Rb'=CH3  Rc=Rc'=CH3 | Ra=CH3  Rb=H  Rb'=CH3  Rc=Rc'=CH3 | Ra=CH3  Rb=Rb'=CH3  Rc=H  Rc'=CH3 | Ra=CH3  Rb=Rb'=CH3  Rc=Rc'=CH3 |
|  |  |  |  |  |
| Energies (kcal·mol-1) | 0.0 | +3.0 | +4.0 | +3.9 |
|  |  |  |  |  |
| Be-C(5-Cp) | 1.903-1.915 | 1.899-1.921 | 1.902-1920 | 1.886-1.937 |
| Be-Cp | 1.475 | 1.476 | 1.478 | 1.487 |
| Be-Ca | 1.785 | 1.769 | 1.773 | 1.770 |
| Ca-Cb | 1.485 | 1.476 | 1.482 | 1.486 |
| Ca-Cb' | 1.485 | 1.483 | 1.487 | 1.486 |
| Cb-Cc | 1.374 | 1.372 | 1.373 | 1.377 |
| Cb'-Cc' | 1.374 | 1.381 | 1.380 | 1.376 |
| Cc-Cc' | 1.460 | 1.453 | 1.445 | 1.455 |
| Ca-Ra | 1.098 | 1.533 | 1.532 | 1.534 |
| Cb-Rb | 1.503 | 1.087 | 1.503 | 1.504 |
| Cb'-Rb' | 1.503 | 1.504 | 1.504 | 1.504 |
| Cc-Rc | 1.504 | 1.503 | 1.088 | 1.504 |
| Cc'-Rc' | 1.504 | 1.505 | 1.505 | 1.504 |
|  |  |  |  |  |
| Be-Ca-Cb | 104.3 | 97.4 | 98.3 | 99.6 |
| Be-Ca-Cb' | 104.3 | 101.3 | 99.0 | 100.1 |
| Be-Ca-CB | 110.9 | 103.2 | 101.7 | 103.7 |
| Be-Ca-Ra | 108.9 | 112.8 | 113.2 | 112.9 |
| Cb-Ca-Cb' | 104.8 | 103.7 | 104.4 | 104.2 |
| CB-Ca-R | 140.2 | 144.0 | 145.0 | 143.4 |
| Cp-Be-Ca | 179.3 | 177.0 | 176.8 | 176.0 |
|  |  |  |  |  |
| Ca-Cb-Cb'-R | 23.5 | 24.1 | 23.7 | 24.7 |
| Ca-Cb-Cb'-Be | -44.8 | -51.0 | -51.9 | -50.4 |
|  |  |  |  |  |

**Table S2.** Atomic coordinates for calculated Be(5-C5Me5)(1-C5Me4H) (Case **A**)

Be -0.176825 -0.441003 -0.578293

C -0.258468 -1.183713 1.012995

C 1.087313 -0.951914 1.596018

C 0.999294 0.086978 2.490628

C -0.398007 0.493913 2.608654

C -1.163777 -0.296356 1.786163

H -0.572560 -2.229850 0.901263

C 0.282966 -0.887388 -2.382949

C 2.289195 -1.793066 1.268028

C 2.113735 0.727479 3.272371

C -2.282065 -1.290605 -2.690107

C -1.086068 -0.482220 -2.263300

C -0.862019 1.594249 3.523706

C -2.330245 1.650823 -1.379358

C -2.662641 -0.350631 1.685828

C 2.604697 0.190368 -1.811806

C 1.101420 0.165674 -1.867837

C 0.239973 1.215329 -1.417531

H -2.476924 2.414586 -2.154560

C 0.677917 2.510269 -0.789266

C -1.110816 0.820415 -1.674424

H 3.229931 -1.308138 1.552056

H 2.350464 -2.024953 0.197200

H 2.256290 -2.759870 1.793177

H 3.093222 0.323578 2.996003

H 1.993946 0.573311 4.354487

H 2.151761 1.815275 3.118117

H -0.675819 1.352004 4.579985

H -1.935003 1.787188 3.421829

H -0.338189 2.540609 3.327324

H -3.069771 -1.210917 2.238740

H -3.002919 -0.460993 0.648378

H -3.142341 0.546203 2.093686

H 1.613952 2.391880 -0.235365

H -0.070527 2.889629 -0.087190

H 0.839725 3.284654 -1.551256

H 2.970269 0.632843 -0.879615

H 3.014489 0.783353 -2.640212

H 3.031737 -0.813548 -1.888349

H -2.246902 2.169830 -0.419098

H -3.238618 1.042750 -1.346157

C 0.766141 -2.192498 -2.956809

H -2.103878 -2.365754 -2.585872

H -2.530586 -1.103328 -3.743317

H -3.170271 -1.048258 -2.098462

H 1.724295 -2.497995 -2.525172

H 0.906660 -2.118742 -4.043502

H 0.053587 -3.003960 -2.776974

**Table S3.** Atomic coordinates for calculated Be(5-C5Me5)(1-C5Me4H) (Case **B**)

Be 0.049036 -0.385256 -0.518588

C -0.019156 -1.246833 1.024792

C 1.275663 -0.782125 1.560333

C 1.077241 0.266159 2.422826

C -0.353951 0.482098 2.554930

C -1.016345 -0.437331 1.766329

C -0.256415 -2.751507 0.855122

C 0.364817 -0.796724 -2.368044

H 0.535530 -3.218878 0.256323

C 2.134163 1.083239 3.112515

C -2.238422 -0.950104 -2.551773

C -0.952477 -0.275660 -2.154716

C -0.951823 1.551873 3.428512

C -1.946301 1.903223 -1.084313

C -2.499256 -0.674806 1.683196

C 2.802249 0.015695 -1.855010

C 1.304111 0.152528 -1.858303

C 0.568816 1.255597 -1.320015

C 0.694030 -2.112410 -3.021000

C 1.154379 2.482319 -0.675641

C -0.825810 0.993583 -1.508924

H -1.209194 -2.964818 0.354855

H -0.275835 -3.267706 1.825928

H 2.237699 -1.206669 1.284566

H 3.136800 0.704535 2.884349

H 2.015326 1.065674 4.204931

H 2.105385 2.141787 2.815234

H -0.719508 1.385920 4.490236

H -2.042316 1.593738 3.340232

H -0.565028 2.550823 3.180894

H -2.789946 -1.599782 2.203756

H -2.844912 -0.781527 0.646613

H -3.073220 0.141182 2.134952

H 2.123053 2.272531 -0.212743

H 0.497742 2.880090 0.104157

H 1.307519 3.279150 -1.416006

H 3.238720 0.383238 -0.920592

H 3.253257 0.586708 -2.677262

H 3.112374 -1.026708 -1.974447

H 1.638626 -2.525231 -2.653268

H 0.789754 -1.999637 -4.109224

H -0.082876 -2.861847 -2.839940

H -2.160178 -2.040725 -2.497355

H -2.514524 -0.695805 -3.583902

H -3.072127 -0.649916 -1.909487

H -2.072215 2.730120 -1.795599

H -1.758682 2.340446 -0.098294

H -2.900436 1.371441 -1.029461

**Table S4.** Atomic coordinates for calculated Be(5-C5Me5)(1-C5Me4H) (Case **C**)

Be 0.201947 -0.195264 -0.371596

C 0.344682 -0.993070 1.205538

C 1.147414 0.042442 1.899094

C 0.287839 0.854518 2.596813

C -1.064497 0.356771 2.485298

C -1.041051 -0.779091 1.701373

H -1.021646 3.454270 -1.335759

C -0.121351 -0.692029 -2.196639

H -0.447103 2.954663 0.262872

H -2.872282 -0.975310 -1.854060

C -2.584875 0.070628 -1.714251

C -1.090113 0.243928 -1.717215

C -2.250946 1.011855 3.139476

C -1.004233 2.622234 -0.619113

C -2.174210 -1.728349 1.423528

C 2.482571 -0.760869 -2.404182

C 1.178285 -0.112832 -2.023339

C 1.010006 1.178420 -1.434896

C -0.401864 -2.044794 -2.794113

C 2.089267 2.167189 -1.089358

C -0.389790 1.393665 -1.232390

H -2.034865 2.437960 -0.303532

C 0.892434 -2.421033 1.112928

C 2.648139 0.123267 1.883486

H -3.045687 0.647091 -2.527094

H -3.031889 0.410473 -0.774456

H 0.573077 1.744776 3.152763

H -2.139520 1.042843 4.232383

H -3.185843 0.483780 2.924545

H -2.378984 2.052425 2.809528

H -2.074269 -2.655467 2.008339

H -2.218247 -2.031694 0.369514

H -3.146983 -1.293453 1.677225

H 3.077927 1.700768 -1.063173

H 1.915826 2.630419 -0.112521

H 2.128050 2.973587 -1.833698

H 3.321678 -0.351746 -1.833283

H 2.705173 -0.605514 -3.468298

H 2.466527 -1.842112 -2.231463

H 0.391486 -2.762757 -2.562273

H -0.476528 -1.985455 -3.888231

H -1.342305 -2.467493 -2.427151

H 2.997848 1.058488 2.335446

H 3.067898 0.067390 0.870551

H 3.100844 -0.702650 2.452337

H 1.895910 -2.444744 0.670601

H 0.254731 -3.066974 0.497343

H 0.965153 -2.889613 2.105701

**Table S5.** Atomic coordinates for calculated Be(5-C5Me4H)(1-C5Me5) (case **D**)

C 1.465601 -1.099641 0.755392

Be -0.627759 0.037596 0.016925

C -3.323545 1.316907 0.943266

C -2.486456 0.576178 -0.064310

C -2.339193 -0.849676 -0.144911

C -1.577473 2.623587 -1.439300

C -3.000300 -1.853695 0.760258

C -1.470036 -1.144943 -1.239001

C -1.038547 -2.503026 -1.720242

C -1.076956 0.097839 -1.813679

H -0.363089 0.217039 -2.619456

C -1.709766 1.162484 -1.108875

C 0.235865 0.207970 2.629711

C 0.709391 0.109465 1.173791

C 1.486486 1.241178 0.604669

C 1.165952 -2.482082 1.266466

C 1.216913 2.682773 0.938403

C 2.495420 0.735353 -0.183020

C 3.480993 1.500780 -1.023219

C 2.482803 -0.716652 -0.089377

C 3.454815 -1.598250 -0.825200

H 1.084983 0.241232 3.328620

H -0.385535 -0.649048 2.916966

H -0.362131 1.110618 2.804497

H 1.613492 2.946350 1.930919

H 0.144140 2.910095 0.964662

H 1.677667 3.368359 0.218791

H 4.513807 1.351976 -0.676683

H 3.286750 2.578055 -1.003889

H 3.459694 1.182706 -2.075420

H 4.492993 -1.397066 -0.524651

H 3.412814 -1.440305 -1.912629

H 3.266491 -2.661121 -0.642478

H 1.512823 -2.612563 2.303002

H 1.652167 -3.258766 0.666479

H 0.090131 -2.700404 1.273528

H -1.679146 3.260963 -0.555682

H -2.352829 2.930141 -2.153615

H -0.604840 2.837852 -1.893171

H -3.336022 0.811429 1.914416

H -4.365435 1.399147 0.605993

H -2.953762 2.334160 1.106310

H -3.085469 -1.484894 1.787881

H -2.443627 -2.795451 0.792490

H -4.016071 -2.087760 0.414361

H -0.881974 -3.206535 -0.896967

H -0.102019 -2.438026 -2.282398

H -1.796771 -2.937867 -2.38452
